# Supplementary material for: Association between symptoms and risk of non-ST segment elevation myocardial infarction according to age and sex in patients admitted to the emergency department with suspected acute coronary syndrome: a single-centre retrospective cohort study
Source: HighWire-hosted journal article supplement (doi:10.1136/bmjopen-2021-054185), 2022-05-01
Supplement: bmjopen-2021-054185supp001_data_supplement.pdf [file bmjopen-2021-054185supp001_data_supplement.pdf]

**Table S1.** Rate of unreported additional symptoms (considered negative).

|                             | NSTEMI<br>(n=175) | Non-NSTEMI<br>(n=1331) | P-value<br>for difference |
|-----------------------------|-------------------|------------------------|---------------------------|
| Shortness of breath         | 45 (25.7)         | 321 (24.1)             | 0.643                     |
| Nausea                      | 93 (53.1)         | 650 (48.8)             | 0.284                     |
| Vomiting                    | 103 (58.9)        | 755 (56.7)             | 0.592                     |
| Diaphoresis or clamminess   | 72 (41.1)         | 740 (55.6)             | <0.001                    |
| Palpitations                | 149 (85.1)        | 1073 (80.6)            | 0.150                     |
| Dizziness                   | 145 (82.9)        | 1003 (75.4)            | 0.028                     |
| Dependent of stature        | 157 (89.7)        | 01131 (85.0)           | 0.094                     |
| Dependent of respiration    | 152 (86.9)        | 1015 (76.3)            | 0.002                     |
| Pain upon palpation         | 145 (82.9)        | 1003 (75.4)            | 0.028                     |
| Effect of NG                | 112 (64.0)        | 982 (73.8)             | 0.006                     |
| Last 24 hours               |                   |                        |                           |
| Exertional chest pain >once | 47 (26.9)         | 149 (11.2)             | <0.001                    |
| Last week                   |                   |                        |                           |
| Exertional chest pain       | 2 (1.1)           | 31 (2.3)               | 0.314                     |
| Shortness of breath         | 2 (1.1)           | 31 (2.3)               | 0.314                     |
