# Supplementary material for: Association between symptoms and risk of non-ST segment elevation myocardial infarction according to age and sex in patients admitted to the emergency department with suspected acute coronary syndrome: a single-centre retrospective cohort study
Source: HighWire-hosted journal article supplement (doi:10.1136/bmjopen-2021-054185), 2022-05-01
Supplement: bmjopen-2021-054185supp002_data_supplement.pdf [file bmjopen-2021-054185supp002_data_supplement.pdf]

**Table S2.** Number and percentage of symptom characteristics based on gender and age.

|                                          | All<br>(n=1506) | Men<br>(n=909) | Women<br>(n=597) | P-value | <70 years<br>(n=1039) | ≥70 years<br>(n=467) | P-value |
|------------------------------------------|-----------------|----------------|------------------|---------|-----------------------|----------------------|---------|
| <b>Presenting symptom</b>                |                 |                |                  |         |                       |                      |         |
| Chest pain                               | 1468 (97.5)     | 882 (97.0)     | 586 (98.2)       | 0.172   | 1020 (98.2)           | 448 (95.9)           | 0.010   |
| <b>Location*</b>                         |                 |                |                  |         |                       |                      |         |
| Retrosternal                             | 661 (45.0)      | 408 (46.1)     | 253 (43.2)       | 0.245   | 487 (47.7)            | 174 (38.8)           | 0.002   |
| Precordial                               | 317 (21.5)      | 223 (25.3)     | 94 (16.0)        | <0.001  | 230 (22.5)            | 87 (19.4)            | 0.180   |
| Thorax, other parts                      | 396 (27.0)      | 220 (24.9)     | 176 (30.0)       | 0.031   | 255 (25.0)            | 141 (31.5)           | 0.010   |
| Shoulders or arms                        | 34 (2.3)        | 19 (2.2)       | 15 (2.6)         | 0.613   | 21 (2.1)              | 13 (2.9)             | 0.323   |
| Jaw or neck                              | 25 (1.7)        | 8 (0.9)        | 17 (2.9)         | 0.004   | 13 (1.3)              | 12 (2.7)             | 0.056   |
| Sum typical <sup>†</sup> location        | 1391 (94.8)     | 849 (96.3)     | 542 (92.5)       | 0.002   | 975 (95.6)            | 416 (92.9)           | 0.031   |
| Epigastric or abdominal                  | 81 (5.5)        | 44 (5.0)       | 37 (6.3)         | 0.276   | 45 (4.4)              | 36 (8.0)             | 0.005   |
| Other location <sup>‡</sup>              | 34 (2.3)        | 15 (1.7)       | 19 (3.2)         | 0.054   | 23 (2.3)              | 11 (2.5)             | 0.814   |
| Sum atypical <sup>§</sup> location       | 114 (7.8)       | 59 (6.7)       | 55 (9.4)         | 0.059   | 68 (6.7)              | 46 (10.3)            | 0.018   |
| <b>Character</b>                         |                 |                |                  |         |                       |                      |         |
| Tight/crushing                           | 960 (65.4)      | 557 (63.2)     | 403 (68.8)       | 0.027   | 683 (67.0)            | 277 (61.8)           | 0.057   |
| Dull/heavy                               | 81 (5.4)        | 53 (5.9)       | 28 (4.8)         | 0.356   | 49 (4.8)              | 31 (6.9)             | 0.100   |
| SUM typical <sup>¶</sup> character       | 1032 (70.3)     | 604 (68.5)     | 428 (73.0)       | 0.061   | 728 (71.4)            | 304 (67.9)           | 0.175   |
| Burning                                  | 89 (6.1)        | 49 (5.6)       | 40 (6.8)         | 0.318   | 60 (5.9)              | 29 (6.5)             | 0.662   |
| Stinging                                 | 218 (14.9)      | 147 (16.7)     | 71 (12.1)        | 0.016   | 175 (17.2)            | 43 (9.6)             | <0.001  |
| Other atypical <sup>‡</sup>              | 2 (0.1)         | 1 (0.1)        | 1 (0.2)          | 1.000   | 2 (0.2)               | 0 (0.0)              | 1.000   |
| Sum atypical <sup>¶</sup> character      | 299 (20.4)      | 192 (21.8)     | 107 (18.3)       | 0.041   | 230 (22.5)            | 69 (15.4)            | 0.006   |
| Unknown                                  | 263 (17.5)      | 169 (19.2)     | 94 (16.0)        | 0.127   | 168 (16.5)            | 95 (21.2)            | 0.029   |
| Typical pain**                           | 981 (81.4)      | 585 (82.0)     | 396 (80.5)       | 0.494   | 697 (81.8)            | 284 (80.5)           | 0.582   |
| Atypical pain <sup>††</sup>              | 224 (15.3)      | 128 (18.0)     | 96 (19.5)        | 0.494   | 155 (18.2)            | 69 (19.5)            | 0.582   |
| <b>Radiation</b>                         |                 |                |                  |         |                       |                      |         |
| Multiple directions                      | 298 (19.8)      | 141 (15.5)     | 157 (26.3)       | <0.001  | 218 (21.0)            | 80 (17.1)            | 0.083   |
| Both arms                                | 66 (4.4)        | 45 (5.0)       | 21 (3.5)         | 0.184   | 43 (4.1)              | 23 (4.9)             | 0.490   |
| Left arm                                 | 296 (19.7)      | 176 (19.4)     | 120 (20.1)       | 0.724   | 212 (20.4)            | 84 (18.0)            | 0.275   |
| Right arm                                | 20 (1.3)        | 10 (1.1)       | 10 (1.7)         | 0.340   | 14 (1.3)              | 6 (1.3)              | 0.922   |
| Both shoulders                           | 25 (1.7)        | 11 (1.2)       | 14 (2.3)         | 0.092   | 14 (1.3)              | 11 (2.4)             | 0.157   |
| Left or right shoulder                   | 92 (6.1)        | 45 (5.0)       | 47 (7.9)         | 0.021   | 67 (6.4)              | 25 (5.4)             | 0.412   |
| Jaw                                      | 321 (21.3)      | 148 (16.3)     | 173 (29.0)       | <0.001  | 238 (22.9)            | 83 (17.8)            | 0.024   |
| Epigastrium or abdomen                   | 38 (2.5)        | 19 (2.1)       | 19 (3.2)         | 0.186   | 28 (2.7)              | 10 (2.1)             | 0.526   |
| Back                                     | 189 (12.5)      | 81 (8.9)       | 108 (18.1)       | <0.001  | 128 (12.3)            | 61 (13.1)            | 0.687   |
| Numbness upper extremities               | 128 (8.5)       | 79 (8.7)       | 49 (8.2)         | 0.742   | 103 (9.9)             | 25 (5.4)             | 0.003   |
| Any radiation                            | 789 (52.4)      | 430 (47.3)     | 359 (60.1)       | <0.001  | 565 (54.4)            | 224 (48.0)           | 0.021   |
| Unknown                                  | 26 (1.7)        | 17 (1.9)       | 9 (1.5)          | 0.597   | 14 (1.3)              | 12 (2.6)             | 0.092   |
| <b>Additional symptoms<sup>‡‡</sup></b>  |                 |                |                  |         |                       |                      |         |
| Shortness of breath                      | 628 (41.7)      | 353 (38.8)     | 275 (46.1)       | 0.005   | 444 (42.7)            | 184 (39.4)           | 0.225   |
| Nausea                                   | 318 (21.1)      | 155 (17.1)     | 163 (27.3)       | <0.001  | 221 (21.3)            | 97 (20.8)            | 0.826   |
| Vomiting                                 | 43 (2.9)        | 27 (3.0)       | 16 (2.7)         | 0.741   | 27 (2.6)              | 16 (3.4)             | 0.372   |
| Diaphoresis or clamminess                | 287 (19.1)      | 188 (20.7)     | 99 (16.6)        | 0.048   | 213 (20.5)            | 74 (15.8)            | 0.033   |
| Palpitations                             | 174 (11.6)      | 89 (9.8)       | 85 (14.2)        | 0.008   | 111 (10.7)            | 63 (13.5)            | 0.115   |
| Dizziness                                | 226 (15.0)      | 118 (13.0)     | 108 (18.1)       | 0.007   | 160 (15.4)            | 66 (14.1)            | 0.524   |
| Sum typical <sup>§§</sup> add. symptoms  | 1005 (66.7)     | 569 (62.6)     | 436 (73.0)       | <0.001  | 699 (67.3)            | 306 (65.5)           | 0.505   |
| Dependent of position                    | 124 (8.2)       | 72 (7.9)       | 52 (8.7)         | 0.586   | 91 (8.8)              | 33 (7.1)             | 0.269   |
| Dependent of respiration                 | 149 (9.9)       | 89 (9.8)       | 60 (10.1)        | 0.869   | 116 (11.2)            | 33 (7.1)             | 0.014   |
| Pain upon palpation                      | 177 (11.8)      | 86 (9.5)       | 91 (15.2)        | 0.001   | 126 (12.1)            | 51 (10.9)            | 0.501   |
| Sum atypical <sup>¶¶</sup> add. symptoms | 351 (23.3)      | 190 (20.9)     | 161 (27.0)       | 0.006   | 254 (24.4)            | 97 (20.8)            | 0.119   |
| Effect of NG                             | 268 (17.8)      | 169 (18.6)     | 99 (16.6)        | 0.319   | 174 (16.7)            | 94 (20.1)            | 0.113   |
| <b>Debut of symptoms</b>                 |                 |                |                  |         |                       |                      |         |
| During physical activity                 | 285 (18.9)      | 199 (21.9)     | 86 (14.4)        | <0.001  | 196 (18.9)            | 89 (19.1)            | 0.929   |
| After physical activity                  | 72 (4.8)        | 45 (5.0)       | 27 (4.5)         | 0.703   | 54 (5.2)              | 18 (3.9)             | 0.259   |
| Acute/chronic stress                     | 115 (7.6)       | 64 (7.0)       | 51 (8.5)         | 0.283   | 96 (9.2)              | 19 (4.1)             | <0.001  |
| During rest                              | 1027 (68.2)     | 602 (66.2)     | 425 (71.2)       | 0.043   | 695 (66.9)            | 332 (71.1)           | 0.105   |
| Unknown                                  | 18 (1.2)        | 9 (1.0)        | 9 (1.5)          | 0.366   | 10 (1.0)              | 8 (1.7)              | 0.215   |
| <b>Symptom duration</b>                  |                 |                |                  |         |                       |                      |         |
| <30 min                                  | 377 (25.0)      | 228 (25.1)     | 149 (25.0)       | 0.957   | 279 (26.9)            | 98 (21.0)            | 0.015   |
| 30-60 min                                | 84 (5.6)        | 44 (4.8)       | 40 (6.7)         | 0.124   | 57 (5.5)              | 27 (5.8)             | 0.817   |
| 60 min to 24 hours                       | 482 (32.0)      | 302 (33.2)     | 180 (30.2)       | 0.211   | 324 (31.2)            | 158 (33.8)           | 0.308   |
| >24 hours                                | 155 (10.3)      | 92 (10.1)      | 63 (10.6)        | 0.787   | 107 (10.3)            | 48 (10.3)            | 0.991   |
| Terminated by NG                         | 88 (5.8)        | 58 (6.4)       | 30 (5.0)         | 0.273   | 62 (6.0)              | 26 (5.6)             | 0.760   |
| Terminated by morphine                   | 37 (2.5)        | 18 (2.0)       | 19 (3.2)         | 0.140   | 21 (2.0)              | 16 (3.4)             | 0.103   |

|                              |            |            |            |       |            |           |       |
|------------------------------|------------|------------|------------|-------|------------|-----------|-------|
| Unknown                      | 283 (18.8) | 167 (18.4) | 116 (19.4) | 0.607 | 189 (18.2) | 94 (20.1) | 0.373 |
| Last 24 hours                |            |            |            |       |            |           |       |
| Exert. chest pain >once      | 48 (3.2)   | 34 (3.7)   | 14 (2.3)   | 0.132 | 26 (0.024) | 22 (4.7)  | 0.024 |
| Last week                    |            |            |            |       |            |           |       |
| Exertional chest pain        | 268 (17.8) | 182 (20.0) | 86 (14.4)  | 0.005 | 174 (16.7) | 94 (20.1) | 0.113 |
| Shortness of breath          | 60 (4.0)   | 32 (3.5)   | 28 (4.7)   | 0.256 | 37 (3.6)   | 23 (4.9)  | 0.211 |
| Pain similar to previous AMI | 57 (3.8)   | 45 (5.0)   | 12 (2.0)   | 0.003 | 36 (3.5)   | 21 (4.5)  | 0.332 |

\* In patients having chest pain at presentation.

† Traditionally considered typical pain location like retrosternal, precordial, other parts of thorax, shoulder, arms, jaw or neck.

‡ Back and other locations.

§ Traditionally considered atypical pain location like epigastrium, abdomen, back or other locations.

¶ Traditionally considered typical pain character like tight, crushing, dull or heavy.

# Traditionally considered atypical pain character like burning, stinging or other.

\*\* Typical pain is defined as traditionally considered typical location and character

†† Atypical pain is defined as either atypical location or character, or both.

‡‡ If not stated considered negative

§§ Traditionally considered typical additional symptoms like shortness of breath, nausea, vomiting, diaphoresis, clamminess, palpitations or dizziness.

¶¶ Traditionally considered atypical additional symptoms like pain dependent of position, respiration or palpation.
